# Supplementary material
Source: publisher figshare collection journal article supplement (https://gsajournals.figshare.com/ndownloader/files/18506000)
Supplement: Supplementary file 1 [file 18506000]

#NEXUS

Begin trees; 
 [!
>Tree from search_WGX_assigns (fixed tree)
>WGT_1Frac_SingF_DSep_model
>FracGenDep: 12.8416
>ToSingleRateD1: 7.0174
>ToSingleRateD2: 0.1262
>ToSingleRateF: 3.0768
>SwitchProb: 0.1141
>Final ln likelihood: -26107.4834
]
	Translate
	1 'Meloidogyne_incognita_v2',
	2 'Meloidogyne_javanica',
	3 'Meloidogyne_arenaria'
	;

tree PAUP_1 = [&R] ((2:0.055828,1:0.0536955):0.00622277,3:0.0394593):0.0171832;
End;
